# Supplementary material for: How mental health status and attitudes toward mental health shape AI Acceptance in psychosocial care: a cross-sectional analysis
Source: Springer Nature journal article supplement (doi:10.1186/s40359-025-02954-z), 2025-06-06
Supplement: MOESM1 [file 40359_2025_2954_MOESM1_ESM.pdf]

## Supplement S1 on detailed sociodemographic data

**Table S1-1.** Participant's additional sociodemographic characteristics not listed in the main text of the article

|                                                              | N   | %    |
|--------------------------------------------------------------|-----|------|
| <i>Living Environment</i>                                    |     |      |
| Village/rural (less than 5,000 inhabitants)                  | 78  | 25.8 |
| Small town (5,000 to 20,000 inhabitants)                     | 88  | 29.1 |
| Large city (over 20,000 inhabitants)                         | 136 | 45.0 |
| <i>Country</i>                                               |     |      |
| Germany                                                      | 298 | 98.7 |
| Austria                                                      | 2   | 0.7  |
| Other                                                        | 2   | 0.7  |
| <i>Migration Background</i>                                  |     |      |
| Yes                                                          | 23  | 7.6  |
| No                                                           | 276 | 91.4 |
| Not specified                                                | 3   | 1.0  |
| <i>Mother tongue</i>                                         |     |      |
| German                                                       | 296 | 98.0 |
| Other/Not specified                                          | 6   | 2.0  |
| <i>Marital status</i>                                        |     |      |
| Single                                                       | 84  | 27.8 |
| In partnership                                               | 58  | 19.2 |
| Married                                                      | 136 | 45.0 |
| Widowed                                                      | 3   | 1.0  |
| Divorced                                                     | 16  | 5.3  |
| Other/Not specified                                          | 6   | 2.0  |
| <i>Children</i>                                              |     |      |
| 0                                                            | 161 | 53.3 |
| 1                                                            | 22  | 7.3  |
| 2                                                            | 54  | 17.9 |
| ≥ 3                                                          | 54  | 17.9 |
| Not specified                                                | 11  | 3.6  |
| <i>Income</i>                                                |     |      |
| < 1500 €                                                     | 46  | 15.2 |
| 1500€ to under 2600 €                                        | 43  | 14.2 |
| 2600€ to under 5000 €                                        | 149 | 49.4 |
| ≥ 5000€                                                      | 54  | 17.9 |
| Not specified                                                | 10  | 3.3  |
| <i>Education</i>                                             |     |      |
| Comprehensive school-leaving certificat <sup>1</sup>         | 5   | 1.7  |
| Completed vocational training/apprenticeship                 | 8   | 2.6  |
| Technical college entrance qualification <sup>2</sup>        | 17  | 5.6  |
| General higher education entrance qualification <sup>3</sup> | 40  | 13.2 |
| Bachelor's degree                                            | 42  | 13.9 |

|                                               |     |      |
|-----------------------------------------------|-----|------|
| Master's degree                               | 171 | 56.6 |
| Doctorate (PhD)/Habilitation                  | 19  | 6.3  |
| <hr/>                                         |     |      |
| <i>Employment</i>                             |     |      |
| In training (school, student, apprenticeship) | 48  | 15.8 |
| Employee (incl. civil servant)                | 213 | 70.6 |
| Self-employed                                 | 11  | 3.6  |
| Unemployed                                    | 4   | 1.3  |
| Pensioner, retired, in early retirement       | 14  | 4.6  |
| Other/ Not specified                          | 12  | 4.0  |
| <hr/>                                         |     |      |

Notes: <sup>1</sup>equivalent to completion of lower or intermediate secondary education;

<sup>2</sup>Fachhochschulreife; <sup>3</sup>Abitur
